## The *Drosophila melanogaster* Y-linked gene, *WDY*, is required for sperm to swim in the female reproductive tract.

Yassi Hafezi, Arsen Omurzakov, Jolie A. Carlisle, Ian V. Caldas, Mariana F. Wolfner, Andrew G. Clark

### ABSTRACT

Unique patterns of inheritance and selection on Y chromosomes leads to the evolution of specialized gene functions. Yet characterizing the function of genes on Y chromosomes is notoriously difficult. We created CRISPR mutants in *Drosophila* of the Y-linked gene, *WDY*, which is required for male fertility. *WDY* mutants produced mature sperm with beating tails that could be transferred to females but failed to enter the female sperm storage organs. We demonstrated that *WDY* mutant sperm's tails beat approximately half as fast as wild-type sperm and that sperm do not propel themselves within the male ejaculatory duct or female reproductive tract (RT). These specific motility defects likely caused the sperm storage defect and sterility of the mutants. Regional and genotype-dependent differences in sperm motility suggested that sperm tail beating and propulsion do not always correlate. Furthermore, we found significant differences in the hydrophobicity of key residues of a putative calcium-binding domain between orthologs of *WDY* that are Y-linked and those that are autosomal. *WDY* was previously shown to be under positive selection. Together these findings suggest that *WDY* is undergoing functional evolution that coincides with its transition from autosomal to Y-linked in *Drosophila melanogaster* and its most closely related species. Finally, we showed that mutants for another Y-linked gene, *PRY*, also show a sperm storage defect that may explain their subfertility. In contrast to *WDY*, *PRY* mutants did swim in the female RT, suggesting they are defective in yet another mode of motility, navigation, or a necessary interaction with the female RT. Overall, we provide direct evidence for the long-held presumption that protein-coding genes on the *Drosophila* Y regulate sperm motility.

### INTRODUCTION

Y chromosomes are unique in the genome of many organisms, including mammals and *Drosophila*, in being haploid, male-limited, repeat-rich, highly heterochromatic, and, in particular, having reduced or no recombination<sup>1</sup>. The resulting selective pressures on Y chromosomes cause rapid degeneration of most protein-coding genes, yet a few genes are maintained on Y chromosomes with remarkable evolutionary endurance. Such genes are maintained for extended periods under strong purifying or sometimes positive selection, repeatedly and independently acquired in different lineages, or undergo massive copy-number amplification on the Y chromosome<sup>2-5</sup>. These patterns of variation indicate that selection favors placing such genes into this seemingly inhospitable genomic environment. In support of this concept, there is striking similarity in both the expression patterns and functions of many Y-linked genes<sup>6-8</sup>.

The 40 MB *Drosophila melanogaster* Y chromosome contains only 14 known protein-coding genes<sup>9-11</sup>. XO flies are male yet sterile – therefore, the Y chromosome is required for male fertility but not sex determination or viability<sup>12</sup>. Six genetic loci – the “fertility factors” – identified and mapped by a series of X-ray induced X-Y translocations, contribute to this fertility function<sup>13,14</sup>. Remarkably, three of the

fertility factors were discovered to be axonemal dyneins<sup>15,16</sup>. This suggests that the Y chromosome plays a pivotal role in sperm motility. However, since no sperm are produced upon genetic ablation of five out of the six fertility factor genes, the role of these genes in sperm motility has never been able to be observed or studied<sup>13,14,17,18</sup>. Moreover, the mechanisms that regulate sperm motility remain poorly understood, and the developmental transition point from immotile to motile sperm has not yet been characterized in *Drosophila*.

In contrast to all other fertility factors, males with a deletion in the *kl-1* fertility factor region produced mature and motile sperm despite being completely sterile<sup>19</sup>. These *kl-1* sperm were transferred to the female reproductive tract (RT) following mating but could not be recovered from the female sperm storage organs, suggesting a defect in sperm storage. The specific defect that prevents *kl-1* mutant sperm from entering storage or fertilizing eggs is unknown. Mutant sperm may be unable to enter sperm storage if they lack a “molecular key” for entry into the female storage organs. Alternatively, subtle quantitative defects in sperm motility may limit the sperm’s ability to enter storage or fertilize eggs.

The molecular identity of *kl-1* remained unknown until recently; a gene with several WD-40 repeats, *WDY*, was found to be contained within the *kl-1* region<sup>20</sup> and suggested to correspond to the *kl-1* fertility factor based on RNA interference (RNAi)<sup>17</sup>. It is still unclear whether *WDY* mutants show a sperm storage defect. The *kl-1* genetic region is very large and was estimated cytologically to span ~3% of the length of the Y chromosome.<sup>21</sup> The *kl-1* region contains at least one other protein-coding gene<sup>20,22</sup> as well as interspersed repetitive elements, including satellite repeats and transposons.

Here we generated CRISPR mutants to further investigate the function of *WDY*. We demonstrate that *WDY* displays the sperm storage defect suggested for *kl-1*. Mutant sperm have reduced beat frequency and are unable to swim beyond the seminal vesicle. We show that mutants in another Y-linked gene, *PRY*, also have impaired sperm-storage. *WDY* and *PRY* are both evolving under positive selection<sup>2</sup> and Y-linked orthologs of *WDY* show significant changes in key amino acid residues in a conserved calcium-binding domain, suggesting directed functional evolution of this gene.

A high incidence of genes with predicted sperm motility functions are seen on Y chromosomes across many species from *Drosophila* to great apes<sup>7,23</sup>. Carvalho et al (2000) hypothesized that, in species where there is a high level of sperm competition (such as *Drosophila melanogaster*), motor proteins are specifically recruited to the Y chromosome where they can evolve without constraint from male-female antagonistic selective forces. Our study provides an in-road to studying the evolutionary logic of this association.

## RESULTS AND DISCUSSION

### ***WDY* mutants are sterile but produce mature, motile sperm**

We used CRISPR to precisely target *WDY*. One of the major challenges of studying the Y chromosome is in propagating sterile mutations on a haploid chromosome. We used a crossing strategy involving compound sex chromosomes to make and stably propagate heritable mutations in *WDY* (mutant stocks consist of  $\widehat{XX} Y, WDY$  females and  $\widehat{XY} Y, WDY$  males, see Methods, Figure S3,<sup>17</sup>). Our crossing scheme also enabled us to identify and eliminate large chromosomal truncations that are common during

genetic editing of the Y chromosome, likely due to its highly repetitive nature<sup>17</sup>. To evaluate the phenotype of our mutants, we then removed the compound chromosomes by selective breeding to generate X Y, *WDY* mutant males. We confirmed each phenotype with three different *WDY* alleles, *F8*, *C104*, and *C3*, containing deletions of 547 bp, 545 bp and 443 bp, respectively (Figure S4, Table S4). All are large deletions close to the N-terminus that disrupt the reading frame and are therefore expected to be null. We compared mutants to controls that account for the genetic background we used, Y<sup>Tomato</sup>, or the crossing scheme we followed, Y<sup>C7</sup> and Y<sup>G107</sup> (see Methods). In individual crosses to females from a wild-type strain (Canton S), all of the control males produced progeny while all of the CRISPR *WDY* males were sterile (Table S5).

To investigate the cause of this sterility, we first examined the distribution of sperm in the testes using Protamine-GFP<sup>24</sup>, which labels sperm heads. We observed an accumulation of *WDY* mutant sperm in the posterior-most section of the testes where sperm coiling occurs, causing that region to bulge (Figure 1). In contrast, sperm are eliminated during the earlier individualization stage in mutants for all of the other Y-linked fertility factors<sup>17,18,25</sup>. Sperm coiling is thought to function as a quality control step - normal, coiled sperm are released into the seminal vesicle, while sperm with abnormal tails and waste products from individualization are ingested by the terminal epithelium<sup>26</sup>. The accumulation of *WDY* sperm in the posterior testes may be due to their progression being stalled by this quality control mechanism or may indicate insufficient motility to exit the testes.

In the seminal vesicles there were fewer sperm in *WDY* mutants than controls (Figure 1C, D). Yet sperm from both *WDY* and control males were observed to beat after we tore open the seminal vesicles (Movie M1,2). We observed no obvious differences in the movement of *WDY* versus control sperm. These observations match Kiefer's conclusion that *kl-1* mutants were sterile but produced seemingly motile sperm<sup>19</sup>. Our results show that *WDY* mutations are sufficient to result in sterility, and it is highly likely that *WDY* is the fertility factor known in the literature as *kl-1*.

### ***WDY* mutant sperm are transferred to females, but do not enter the storage organs**

We next tracked the movement of Protamine-labelled sperm in the RT of wild-type (Canton S) females 30 min after the start of mating (mASM). Sperm from both control and *WDY* mutant males were found in the female uterus (bursa) (Figure S5) and were observed to beat when dissected out of the uterus (Movie M3,4). In normal females, the receipt of sperm is accompanied by a change in the conformation of the uterus from folded to open, which may facilitate passage of sperm into storage<sup>27,28</sup>. In both *WDY* and control genotypes, the conformation of the uterus correlated with the presence or absence of sperm, as expected<sup>28</sup>. We conclude that motile *WDY* sperm are transferred to females and that *WDY* seminal fluid induces conformational changes in the uterus, as normal.

We did, however, observe defects in the number of sperm transferred and the distribution of the sperm within the female RT. We used automated object detection (Imaris software) to quantify the number of sperm transferred to the female RT. *WDY* males transferred less than half of the number of sperm that control males transferred (Figure 2A,  $p < 0.001$ ). After mating, *Drosophila* sperm move rapidly from the uterus into either the primary storage organ, the seminal receptacle, or one of two long-term storage organs, the spermathecae<sup>29</sup> (Figure 2B). At 30 mASM, most control samples contained some stored sperm but no *WDY* sperm were found in the storage organs. We examined later time points to

distinguish whether sperm are unable to enter storage or are delayed in doing so. At 2 hASM maximal numbers of sperm are stored in most control samples (~ 1,100 sperm are stored out of ~4,000-6,000 transferred<sup>30</sup>), yet again, no sperm were found in storage in samples containing *WDY* mutant sperm (Figure 2C-E). We also examined sperm in RTs of females left to mate overnight to see if a longer time or multiple mating may enable sperm to enter storage (Figure S5). Control samples all had stored sperm. *WDY* sperm were regularly observed in the uterus but never in any of the storage organs. We conclude that *WDY* mutant sperm is unable to enter the storage organs. In many animals, storage is required for sperm to become competent for fertilization, thus the lack of sperm storage might explain why *WDY* males are sterile.

### ***WDY* mutant sperm in the seminal vesicle and uterus have decreased beat frequency**

Although *WDY* mutant sperm beat visibly (Movie M1-4), we wished to test whether there are important, yet subtle, differences in their motility, relative to controls, that prevent them from being able to enter storage. We measured the beat frequency of sperm tails, by recording videos of control and *WDY* mutant sperm dissected directly from the male seminal vesicle or from the female uterus at 30 mASM. Dissected sperm masses all contain sperm tails beating at a range of frequencies - we specifically quantified the beat frequency of the fastest beating sperm from clips taken of different regions around the sperm mass (Movie M1-4, Figure 3A, B). In the seminal vesicle, the fastest *WDY* mutant sperm beat at an average of 6.0 Hz while the fastest control sperm beat at an average of 12.3 Hz ( $p < 0.001$ ). In the female uterus, the fastest *WDY* mutant sperm beat an average of 7.0 Hz while the fastest control sperm beat at an average of 13.1 Hz ( $p < 0.001$ ). We conclude that *WDY* mutant sperm have a lower beat frequency than wild type sperm in both the male and female RTs.

### ***WDY* mutant sperm are unable to swim in the ejaculatory duct and uterus**

We hypothesized that the lower beat frequency affects the ability of sperm to propel themselves forward. To test for defects in sperm swimming, sperm movement was assessed in videos by tracking the Protamine-labelled heads of control and *WDY* mutant sperm. In all regions, some proportion of sperm heads remained stationary and there was variation in swimming speed of individual sperm, but there was an overriding regional pattern to the motility (Figure 3C-J). It was previously suggested, and often repeated, that sperm do not gain motility until they reach the seminal vesicle<sup>31</sup>. While the majority of sperm heads from the testes were immotile, we were surprised to see some sperm heads slowly moving in the posterior testes of most control samples (Figure 3C,C', Movie M5). This suggests that sperm motility is normally initiated within the testes. *WDY* mutant sperm heads in this region also often moved around, suggesting that at least some mutant sperm develop motility (Figure 3D,D', Movie M6).

Sperm heads ceased to move in the seminal vesicles of both control and *WDY* mutant flies, while flagella remained beating. We did often observe mass movements from contractions of the organ, but there was very little movement by individual sperm heads. It was unclear whether dense packing of sperm or some physical or chemical property of the seminal vesicle caused the immobilization of sperm heads while sperm tails continued to beat vigorously (Figure 3E,E', Movie M7). This highlights that flagellar



beating does not necessarily correlate with sperm swimming (i.e. moving through space). There were far fewer sperm in *WDY* mutant seminal vesicles, but the mutant sperm heads were predominantly immobilized, as in controls (Figure 3F,F', Movie M8). We conclude that at least some *WDY* sperm develop the ability to swim in the testes and become immobilized in the seminal vesicle, as normal.

In contrast, a striking difference was seen in the ability of *WDY* sperm to swim beyond the seminal vesicle. In samples where sperm were found in the ejaculatory duct, control sperm heads were observed to move swiftly while *WDY* sperm heads appeared motionless (Figure 3G-H, G'-H', Movie M9-10). The same pattern was observed for sperm heads in the uterus 1 hASM. These sperm appear to be alive as the tails continue to beat in place (Figure 3A,B). The lack of swimming *WDY* sperm in the uterus likely explains the inability of *WDY* sperm to enter the storage organs, though other defects may also exist and contribute. That *WDY* sperm in the posterior testes can swim suggests either (1) there is a subclass of *WDY* sperm that are capable of swimming but degenerate or (2) *WDY* mutant sperm are unable to navigate between different regions of the RTs.

### **Significant hydrophobicity differences in putative calcium-binding residues coincide with *WDY*'s transition to Y-linkage in *Drosophila melanogaster***

We examined *WDY*'s amino acid sequence in *Drosophila melanogaster* for further clues to the protein's functions. We improved the annotation of WD40 repeats and domains based on predictions by AlphaFold of the locations of characteristic  $\beta$ -propeller structure consisting of 4 antiparallel sheets<sup>32</sup> (see methods, Figure 4A). WD40 domains mediate protein-protein interactions that may lead to the assembly of large protein complexes or facilitate signal transduction. *WDY* also contains an EF Hand domain signature (Interpro<sup>33</sup>). EF Hand domains contain a pair of EF-hand motifs, each consisting of a loop flanked by alpha helices that bind to  $\text{Ca}^{2+}$  ions. The specific characteristics of the loop affect calcium-binding affinity and thereby the function of EF-hand domain-containing proteins<sup>34</sup>. Using the EF Hand consensus sequences<sup>35</sup> and allowing for one mismatch, we identified putative paired EF hand motifs in *WDY*, a pseudo EF hand followed by a canonical EF hand (Figure 4A-C). Known calcium-binding proteins (e.g. Calbindin D9K<sup>35</sup>) are known to display this configuration. Calcium regulates sperm motility in many organisms, including humans<sup>36</sup>. In *Drosophila*, *Pkd2*, a calcium channel that localizes to sperm tails, is required for sperm to hyperactivate in the female RT and enter the sperm storage organs<sup>37-39</sup>. Therefore, a calcium-binding function would fit with the role we have established for *WDY* in sperm motility and storage. We speculate that differences in calcium or other cues between different regions of the RT drive the differences in motility that we see and that *WDY* is necessary for sperm to recognize and respond to such cues in transitioning through the RT.

We also compared sequences of the EF Hand domain between *WDY* orthologs in the melanogaster species group, where *WDY* is Y-linked, and the obscura species group, where *WDY* homologs are autosomal or X-linked<sup>4</sup>. While there was relative conservation of the domain within each group (82.4% identical sites in each group), there were notable differences between the groups (63.2% identical sites overall). Pseudo EF Hand motifs are generally less well conserved than canonical motifs, but the Odd EF Hand motif in *WDY* showed striking differences in the hydrophobicity between the two species groups in seemingly important loop residues (Figure 4B). The transition in hydrophobicity at position 1 is particularly compelling since it involves a profound biochemical change in a position that is well conserved in most pseudo EF Hand motifs<sup>35</sup>. The shift away from canonical residues in the "X" position

could indicate a modulation of calcium binding. We speculate that *WDY* has undergone significant functional evolution in the EF Hand domain that coincided with its Y-linkage.

### ***PRY* is also required for efficient sperm storage**

We previously generated and characterized mutants in another Y-linked gene, *PRY*, whose phenotype was consistent with abnormal sperm storage in females: mutants had low levels of fertility on the first day after mating but no fertility on subsequent days<sup>17</sup>. Our finding that *WDY* affects sperm entry to the storage organs led us to wonder whether *PRY* affects a similar step. In contrast to *WDY*, *PRY* mutant sperm do swim in the female RT (Movie M13). However, when sperm heads were tracked with Protamine-GFP 2 hASM, the number of *PRY* sperm stored was significantly reduced compared to controls (Figure 2F-H). *PRY* mutant sperm were frequently absent or reduced in the seminal receptacle, and rarely observed in the spermathecae. The number of stored *PRY* sperm was similar in RTs 2 hASM and 24 hASM (Figure S5) – defined times after a single, observed mating. However, significantly more sperm entered storage organs if males and females were housed together overnight (Figure S5). Seminal fluid proteins responsible for long term physiological effects of mating on females, including the inhibition of remating, can bind to sperm tails<sup>2,40–42</sup>. Thus, lack of stored *PRY* sperm may lead to increased remating in these females.

The poor ability of *PRY* mutant sperm to enter storage may be caused by insufficient swimming speeds or an inability to navigate to or gain entry into the storage organs. It seems to be a commonly emerging theme that defects in *Drosophila* sperm motility lead to defects in sperm storage. Female secretions are necessary to promote sperm storage<sup>43</sup> – entry to sperm storage may be a hurdle imposed by females to ensure that only sperm with a certain level of motility/fitness are able to fertilize eggs. Higher remating rates upon lower sperm storage, as we appear to see with *PRY*, would then likely contribute to elimination of such sperm from the female RT through sperm competition.

Overall, we present functional evidence for a role for two Y-linked genes in sperm motility. We demonstrate that *WDY* functions in sperm motility, culminating in a defect in sperm's ability to enter storage. We previously showed that *PRY* mutant males are sub-fertile and now demonstrate that *PRY* mutant sperm enter storage at a severely reduced rate, consistent with a motility defect. Three axonemal dyneins were previously discovered on the Y chromosome<sup>15,16</sup>. Across species, but especially in *Drosophila melanogaster*, the Y-linked genes appear to show strong 'functional coherence'<sup>6,18</sup>. Even within the confines of male fertility, a disproportionate number of Y-linked genes seem to be focused on aspects of sperm motility<sup>15,16</sup>. On the one hand being Y-linked allows sperm motility genes to escape the problems of countervailing selection in females (sexual conflict). However, being Y-linked bears the cost of not being able to recombine, which reduces the efficacy of natural selection (the Hill-Robertson effect). The fact that so many sperm motility genes are retained on the Y chromosome indicates that these two opposing selective forces may be in a state of balance.

## FIGURE LEGENDS

### Figure 1: Spermatogenesis is backed up in *WDY* testes, but some mature sperm are found in the seminal vesicle

Whole testes from control (A) and *WDY* mutant (B) males whose sperm were labelled with Protamine-GFP (green), Phalloidin (red) and DAPI (blue) overlaid on brightfield images. C-F Higher magnification view of posterior testes and seminal vesicle. Inset (D') shows Protamine-labelled sperm in seminal vesicle of mutant. Testes (T) and seminal vesicle (SV) are marked. Scale is 100  $\mu\text{m}$  for A-B, 50  $\mu\text{m}$  for C-F, and 20  $\mu\text{m}$  for D'.

### Figure 2: *WDY* and *PRY* mutant sperm fail to enter the storage organs in the female RT

(A) Quantification of the number of sperm transferred to the female uterus 30 mASM to control or *WDY* mutant males. (B) Cartoon of the female RT indicating the mating plug (MP, brown), uterus (yellow), and the storage organs – the seminal receptacle (SR, green) and two spermathecae (STH, blue). (C) Quantification of the distribution of sperm within the female RT 2hASM. Representative images show Protamine-labelled sperm from Control (D) and *WDY* (E) mutant males within the female RT 2 hASM. (F) Quantification of the distribution of sperm within the female RT 2 hASM. Representative images show Protamine-labelled sperm from Control (G) and *PRY* (H) mutant males within the female RT 2 hASM. Scale is 100  $\mu\text{m}$ .

### Figure 3: *WDY* mutant sperm have reduced beating frequency and do not swim in the female RT

Quantification of tail beating frequency of *WDY* and control sperm dissected from seminal vesicles (A) and the female RT 30 mASM (B). Manual tracking of Protamine-GFP-labelled control (C,E,G,I) and *WDY* mutant (D,F,H,J) sperm heads over a 0.5 sec interval for representative videos of the posterior testes (C,D), seminal vesicle (E,F), ejaculatory duct (G,H), and uterus 1h ASM (I,J). (C'-J') Corresponding quantification of the number of sperm heads and degree of movement observed from videos of each region of the RTs. The number of each type of organ that was scored is indicated.

### Figure 4: Difference in hydrophobicity in the EF Hand Domain in Y-linked orthologues of *WDY* in *Drosophila melanogaster* and its closest relatives

(A) Domain structure of *WDY* (B,C) Protein alignment of *melanogaster* and obscura group species for the region with the Odd (Pseudo) (B) and Even (Canonical) (C) EF Hand motif. Green bar indicates the motif, M indicates the position of any mismatch between the *melanogaster* sequence and the consensus, and black boxes indicate putative calcium-binding residues (X,Y,Z,-X,-Y,-Z). (D) Predicted AlphaFold structure of Odd EF Hand domain with putative calcium binding residues labelled, generated in PyMOL. Blue-red scale indicates hydrophobicity (Red is hydrophobic, Blue is hydrophilic).

**Movie M1: Sperm dissected from seminal vesicles of control males.**

**Movie M2: Sperm dissected from seminal vesicles of *WDY* males.**

**Movie M3: Sperm dissected from the uterus of females mated to control males.**

**Movie M4: Sperm dissected from the uterus of females mated to *WDY* males.**

**Movie M5: Control sperm heads in the posterior testes.**

**Movie M6: *WDY* sperm heads in the posterior testes.**

**Movie M7: Control sperm heads in the seminal vesicle.**

**Movie M8: *WDY* sperm heads in the seminal vesicle.**

**Movie M9: Control sperm heads in the ejaculatory duct.**

**Movie M10: *WDY* sperm heads in the ejaculatory duct.**

**Movie M11: Control sperm heads in the uterus.**

**Movie M12: *WDY* sperm heads in the uterus.**

**Movie M13: *PRY* sperm heads in the uterus**

## ACKNOWLEDGEMENTS

We thank Yaoyi Xing, Emeka Okorie, Julia Kelso, Elissa Cosgrove, the Imaging Facility at the Cornell Institute of Biotechnology (RRID:SCR\_021741) and the Cornell Statistical Consulting Unit for assistance with experiments or analysis. We thank Susan Suarez and Nora Brown and other members of the Clark and Wolfner laboratories for feedback, advice, and support.

Stocks obtained from the Bloomington Drosophila Stock Center (National Institutes of Health grant P40OD018537) were used in this study. This work was supported by funds from the National Institutes of Health (R01-HD059060 to A. Clark and M. Wolfner, and R01-GM119125 to A. Clark and D. Barbash).

## REFERENCES

1. Bachtrog, D. Y chromosome evolution: emerging insights into processes of Y chromosome degeneration. *Nat. Rev. Genet.* **14**, 113–124 (2013).
2. Singh, N. D., Koerich, L. B., Carvalho, A. B. & Clark, A. G. Positive and Purifying Selection on the Drosophila Y Chromosome. *Mol. Biol. Evol.* **31**, 2612–2623 (2014).
3. Koerich, L. B., Wang, X., Clark, A. G. & Carvalho, A. B. Low conservation of gene content in the Drosophila Y chromosome. *Nature* **456**, 949–951 (2008).
4. Dupim, E. G. *et al.* An investigation of Y chromosome incorporations in 400 species of Drosophila and related genera. *PLoS Genet.* **14**, e1007770 (2018).
5. Ellison, C. & Bachtrog, D. Recurrent gene co-amplification on Drosophila X and Y chromosomes. *PLoS Genet.* **15**, e1008251 (2019).
6. Mahajan, S. & Bachtrog, D. Convergent evolution of Y chromosome gene content in flies. *Nat Commun* **8**, 785 (2017).
7. Cechova, M. *et al.* Dynamic evolution of great ape Y chromosomes. *Proc. Natl. Acad. Sci.* **117**, 26273–26280 (2020).
8. Lahn, B. T. & Page, D. C. Functional Coherence of the Human Y Chromosome. *Science* **278**, 675–680 (1997).

9. Kotov, A. A., Bazylev, S. S., Adashev, V. E., Shatskikh, A. S. & Olenina, L. V. Drosophila as a Model System for Studying of the Evolution and Functional Specialization of the Y Chromosome. *Int. J. Mol. Sci.* **23**, 4184 (2022).
10. Bachtrog, D. The Y Chromosome as a Battleground for Intragenomic Conflict. *Trends Genet.* **36**, 510–522 (2020).
11. Chang, C.-H. & Larracuente, A. M. Heterochromatin-Enriched Assemblies Reveal the Sequence and Organization of the Drosophila melanogaster Y Chromosome. *Genetics* **211**, 333–348 (2019).
12. Bridges, C. B. Non-Disjunction as Proof of the Chromosome Theory of Heredity (Concluded). *Genetics* **1**, 107–163 (1916).
13. Brosseau, G. E. Genetic Analysis of the Male Fertility Factors on the Y Chromosome of Drosophila Melanogaster. *Genetics* **45**, 257–274 (1960).
14. Kennison, J. A. The Genetic and Cytological Organization of the Y Chromosome of DROSOPHILA MELANOGASTER. *Genetics* **98**, 529–548 (1981).
15. Carvalho, A. B., Lazzaro, B. P. & Clark, A. G. Y chromosomal fertility factors kl-2 and kl-3 of Drosophila melanogaster encode dynein heavy chain polypeptides. *Proc. Natl. Acad. Sci. U. S. A.* **97**, 13239–13244 (2000).
16. Gepner, J. & Hays, T. S. A fertility region on the Y chromosome of Drosophila melanogaster encodes a dynein microtubule motor. *Proc. Natl. Acad. Sci. U. S. A.* **90**, 11132–11136 (1993).
17. Hafezi, Y., Sruba, S. R., Tarrash, S. R., Wolfner, M. F. & Clark, A. G. Dissecting Fertility Functions of Drosophila Y Chromosome Genes with CRISPR. *Genetics* **214**, 977–990 (2020).
18. Zhang, J., Luo, J., Chen, J., Dai, J. & Montell, C. The Role of Y Chromosome Genes in Male Fertility in. *Genetics* (2020).
19. Kiefer, B. I. Phenotypic Effects of Y Chromosome Mutations in DROSOPHILA MELANOGASTER I. Spermiogenesis and Sterility in KL-1- Males. *Genetics* **61**, 157–166 (1969).
20. Vibranovski, M. D., Koerich, L. B. & Carvalho, A. B. Two new Y-linked genes in Drosophila melanogaster. *Genetics* **179**, 2325–2327 (2008).
21. Gatti, M. & Pimpinelli, S. Cytological and genetic analysis of the Y chromosome of Drosophila melanogaster. *Chromosoma* **88**, 349–373 (1983).
22. Carvalho, A. B., Dobo, B. A., Vibranovski, M. D. & Clark, A. G. Identification of five new genes on the Y chromosome of Drosophila melanogaster. *Proc. Natl. Acad. Sci. U. S. A.* **98**, 13225–13230 (2001).
23. Schaller, F. *et al.* Y Chromosomal Variation Tracks the Evolution of Mating Systems in Chimpanzee and Bonobo. *PLOS ONE* **5**, e12482 (2010).
24. Manier, M. K. *et al.* Resolving mechanisms of competitive fertilization success in Drosophila melanogaster. *Science* **328**, 354–357 (2010).
25. Hardy, R. W., Tokuyasu, K. T. & Lindsley, D. L. Analysis of spermatogenesis in Drosophila melanogaster bearing deletions for Y-chromosome fertility genes. *Chromosoma* **83**, 593–617 (1981).
26. Tokuyasu, K. T., Peacock, W. J. & Hardy, R. W. Dynamics of spermiogenesis in Drosophila melanogaster. II. Coiling Process. *Z. Für Zellforsch. Mikrosk. Anat.* **127**, 492–525 (1972).

27. Adams, E. M. & Wolfner, M. F. Seminal proteins but not sperm induce morphological changes in the *Drosophila melanogaster* female reproductive tract during sperm storage. *J. Insect Physiol.* **53**, 319–331 (2007).
28. Avila, F. W. & Wolfner, M. F. Acp36DE is required for uterine conformational changes in mated *Drosophila* females. *Proc. Natl. Acad. Sci. U. S. A.* **106**, 15796–15800 (2009).
29. Bloch Qazi, M. C., Heifetz, Y. & Wolfner, M. F. The developments between gametogenesis and fertilization: ovulation and female sperm storage in *Drosophila melanogaster*. *Dev. Biol.* **256**, 195–211 (2003).
30. Gilbert, D. G. Ejaculate esterase 6 and initial sperm use by female *Drosophila melanogaster*. *J. Insect Physiol.* **27**, 641–650 (1981).
31. Lefevre, G. & Jonsson, U. B. Sperm Transfer, Storage, Displacement, and Utilization in *Drosophila Melanogaster*. *Genetics* **47**, 1719–1736 (1962).
32. Jain, B. P. & Pandey, S. WD40 Repeat Proteins: Signalling Scaffold with Diverse Functions. *Protein J.* **37**, 391–406 (2018).
33. Paysan-Lafosse, T. *et al.* InterPro in 2022. *Nucleic Acids Res.* **51**, D418–D427 (2023).
34. Michiels, J., Xi, C., Verhaert, J. & Vanderleyden, J. The functions of Ca<sup>2+</sup> in bacteria: a role for EF-hand proteins? *Trends Microbiol.* **10**, 87–93 (2002).
35. Zhou, Y. *et al.* Prediction of EF-hand calcium-binding proteins and analysis of bacterial EF-hand proteins. *Proteins Struct. Funct. Bioinforma.* **65**, 643–655 (2006).
36. Hong, C. Y., Chiang, B. N. & Turner, P. Calcium ion is the key regulator of human sperm function. *Lancet Lond. Engl.* **2**, 1449–1451 (1984).
37. Köttgen, M. *et al.* *Drosophila* sperm swim backwards in the female reproductive tract and are activated via TRPP2 ion channels. *PLoS One* **6**, e20031 (2011).
38. Watnick, T. J., Jin, Y., Matunis, E., Kernan, M. J. & Montell, C. A Flagellar Polycystin-2 Homolog Required for Male Fertility in *Drosophila*. *Curr. Biol.* **13**, 2179–2184 (2003).
39. Gao, Z., Ruden, D. M. & Lu, X. PKD2 Cation Channel Is Required for Directional Sperm Movement and Male Fertility. *Curr. Biol.* **13**, 2175–2178 (2003).
40. Peng, J. *et al.* Gradual Release of Sperm Bound Sex-Peptide Controls Female Postmating Behavior in *Drosophila*. *Curr. Biol.* **15**, 207–213 (2005).
41. Misra, S. & Wolfner, M. F. *Drosophila* seminal sex peptide associates with rival as well as own sperm, providing SP function in polyandrous females. *eLife* **9**, e58322 (2020).
42. Misra, S., Buehner, N. A., Singh, A. & Wolfner, M. F. Female factors modulate Sex Peptide's association with sperm in *Drosophila melanogaster*. *BMC Biol.* **20**, 279 (2022).
43. Schnakenberg, S. L., Matias, W. R. & Siegal, M. L. Sperm-Storage Defects and Live Birth in *Drosophila* Females Lacking Spermathecal Secretory Cells. *PLoS Biol.* **9**, e1001192 (2011).



## METHODS

### *Drosophila* Stocks and Husbandry

Flies were reared on a cornmeal-agar-sucrose medium (recipe available at <https://cornellfly.wordpress.com/s-food/>) at 25°, with a 12 hr light-dark cycle. The stocks used in this study are described in Table S1.

### Generation of a *WDY* Mutant with CRISPR

Three 20 base pair guides were designed to target exon 2 of *WDY*, a region of the gene with no known duplications (Figure S1) <sup>1</sup>. We also targeted *ebony*, a visible Co-CRISPR marker <sup>2</sup>. Guides were incorporated into pAC-U63-tgRNA-Rev (Addgene, Plasmid #112811) which is analogous to the “tgFE” construct from [3]. This was done by appending guide sequences to tracrRNA core and tRNA sequences from pMGC (Addgene, Plasmid #112812) through tailed primers (Table S3) to create inserts that were then inserted by Gibson Assembly into a *SapI*-digested pAC-U63-tgRNA-Rev (Addgene, Plasmid #112811). The plasmid backbone contained attB, and we used Phi-C31 to integrate it into an attP-9A site on chromosome 3R. The construct was injected into *yw nanos-phiC31; PBac{y+-attP-9A}VK00027* by Rainbow Transgenic Flies Inc. Transformants were identified by eye color from a *mini-white+* marker. Transformants express the four guides ubiquitously under the U6:3 promoter as a single polycistronic transcript that is processed by the endogenous cellular tRNA processing machinery (RNase P and Z) to release the individual mature gRNAs and interspersed tRNAs. The transformants were balanced and inserts were confirmed by PCR and sequencing. A few of the transformants had light-red eyes, but we only used those with dark-red eyes.

Different combinations of transformants and germline Cas-9 drivers were tested for editing efficiency (data not shown). Males containing *vasa-Cas9* and our guides were sterile while females showed a 6.2% CRISPR efficiency, based on the generation of *ebony* mutants. In contrast, F1 males from crosses with *nanos-Cas9* drivers on chromosomes 2 and 3 produced progeny. F2 progeny (from male and female crosses combined) showed that these two lines had editing efficiencies of 2.2% and 2.6%, respectively. Our observation of higher efficiency and sterility from *vasa-Cas9* is consistent with the earlier <sup>4</sup> and higher somatic <sup>5,6</sup> protein expression of Vasa versus Nanos, as well as the RNAi phenotype of *WDY* <sup>7</sup>. We proceeded to make stable mutants by crossing transformant #1 to *nanos-Cas9* in a compound chromosome background.

Our crossing scheme for creating *WDY* alleles is shown in Figure S3. We combined the *nanos-Cas9* driver on chromosome 3 with a Y chromosome marked with *3xP3-tdTomato* <sup>8</sup>. We also combined the guide-expressing insert on 3R with a compound X ( $\widehat{X}\widehat{X}$ ; *C(1)M4, y[1]*). CRISPR editing occurred in F1 females ( $\widehat{X}\widehat{X}Y^{3xP3-tdTomato}$ ) that carried the marked Y chromosome. By crossing to a compound X-Y ( $\widehat{X}\widehat{Y}$ , *C(1;Y)1, y[1]*) we were able to establish balanced lines from 55 *ebony* and 5 non-*ebony* F2 flies. Males were of genotype  $\widehat{X}\widehat{Y} Y^{3xP3-tdTomato}$  and were fertile regardless of CRISPR-mediated edits of the free Y. We screened these lines for visible deletions in the *WDY* target site – first by gel, then by sequencing. Alleles derived from our crossing scheme are listed in Table S4 and described in Figure S4. They are maintained as stable lines with  $\widehat{X}\widehat{X}Y$  females and  $\widehat{X}\widehat{Y}Y$  males; the free Y chromosome is edited.

In several of our lines, we saw varying, intermediate degrees of position effect variegation (PEV) (Figure S2). This corresponded with either failed amplification at the target site in *WDY* or the presence of several bands of unexpected size. Based on our previous results when editing *FDY* with CRISPR<sup>7</sup>, we hypothesized that there were large deletions in the Y chromosome. C(1)M4 contains *white[mottled-4]*, a PEV marker that is highly sensitive to Y-chromosome dosage.  $\widehat{X}\widehat{X}$  females with C(1)M4 have mostly white eyes, while  $\widehat{X}\widehat{X}$  females have an almost entirely red eye. We previously showed that lines with visibly altered PEV lacked large sections of the Y chromosome<sup>7</sup>. Such deletions may be caused by the presence of uncharacterized copies of the target region present in unassembled regions of the Y chromosome.

### **Sterility, Mating, and Sperm Storage**

Crosses and experiments were done with flies 2-5 days after eclosion (dAE). To test for sterility, we crossed individual XY males to 4 Canton S virgin females in a food containing vial with wet yeast. Adults were transferred to a new vial after one week. Crosses were scored for the presence of progeny. 15-20 crosses were tested per line. For experiments that required timing from the start of mating, one Canton S virgin female was mated to three males of a given genotype and flies were observed. Once mating began the time was noted. Females were analyzed or flash frozen in liquid nitrogen for 30 minutes, 2 hours, or 24 hours after the start of mating (30 mASM, 2 hASM, 24 hASM). Reproductive tracts were dissected from frozen females in PBS, fixed in 4% paraformaldehyde, and mounted in Vectashield with DAPI. Samples were imaged on an Echo Revolve microscope or a Leica DMRE confocal microscope.

### **Sperm Counting with Imaris**

To quantify sperm transferred, female reproductive tracts 30mASM were imaged on a Leica DMRE confocal using standardized settings. Two  $\mu\text{m}$  Z-stacks through each sample were collected. Using Imaris 9.8.0 software (RRID:SCR\_007370), first the female reproductive tract was extracted in each image by manually drawing a contour surface. The mating plug and cuticle were specifically excluded due to their high autofluorescence<sup>9</sup>. Second, protamine-labelled sperm heads were automatically detected using the “Surfaces” function (smoothing and background elimination enabled, 2.0  $\mu\text{m}$  surface grain size, 1  $\mu\text{m}$  diameter of largest sphere, 2.747-13.048 manual threshold, >15 quality, <0.8 sphericity). Counts of transferred sperm from control and *WDY* males were statistically compared using a Student’s t-test in R software.

### **Sperm Beat Frequency Analysis**

Beat frequency was measured for sperm dissected from the reproductive tracts of males 2-5dAE or females 2-5 dAE and 30 mASM into PBS. Sperm were released into a 15  $\mu\text{l}$  drop of PBS on a glass slide by tearing the male seminal vesicle or female uterus. Sperm were observed under brightfield optics with an Olympus BX51WDI microscope and a 50x LMPLFLN objective. Eight second raw movie clips at 1280x720 resolution and 60 frames per second were captured from 4-6 different regions around the sperm mass using a Canon EOS Rebel T6 camera.

To measure the sperm beating frequency, video clips were imported to FIJI (RRID:SCR\_002285) using the ffmpeg plug-in. From each clip, we measured beat frequencies of the 1-2 fastest-beating sperm, limited to tails that were not overlapping or entangled with other sperm tails. A selection line was drawn across an isolated section of sperm tail. A 1-pixel “Multi Kymograph” was generated which shows pixel intensities across the selection line on the X-axis for each frame along the Y-axis. The beating of the sperm tail appears as a traveling wave form. The number of beats and the number of frames were counted for the region where the sperm tail remained in focus and isolated from other tails. Beat frequency was then calculated as:  $\text{Hz} = (\# \text{ beats} \times 60 \text{ fps}) / \# \text{ frames}$ . Ten measurements were made per individual fly. Approximately one-third of samples were scored blind, and statistical analysis indicated consistent results whether samples were scored blind or not.

Sperm beat frequencies were measured from a minimum of three individuals of each allele. Using the lme4 package in R, linear mixed models were fit to the data, incorporating the individual as a random effect and experimental batch and the experimenter who measured beat frequency as fixed effects. We then ran a Likelihood-Ratio test to compare the model with and without “Genotype” as a fixed effect.

### **Sperm Swimming Analysis**

Videos of sperm swimming were acquired from either male reproductive tracts or female reproductive tracts 1 hASM. Tracts were dissected and mounted in 15  $\mu\text{L}$  PBS. Spacers (2 layers of double-stick tape) were used to avoid compression of the tissue by the coverslip. Fluorescent sperm heads were recorded through screen recording of the preview window on an Echo Revolve. We used ffmpeg (RRID:SCR\_016075) to convert videos to constant frame rate of 60 fps and .mov format. Videos were then imported into FIJI (RRID:SCR\_002285) using the ffmpeg plugin. We manually tracked sperm heads across 60 frames using the “Manual Tracking” plugin in FIJI. The tracking shown in Figure 3 represent movement across 30 frames.

### **WDY Annotation and Sequence Comparisons**

Three WD40 domains (Vibrantovski, Koerich, and Carvalho 2008) were originally identified in the protein sequence based on homology. Flybase reported a handful of WD40 repeats (2 for Pfam and 8 for SMART) were identified. 4 to 16 of these repeat domains may together form a circular beta propeller structure called a WD40 domain (2,3); however, insufficient WD40 repeats were identified in WDY to predict the presence of a WD40 domain. We used the a structural prediction of *Drosophila melanogaster* WDY by AlphaFold (PDB B4F7L9) <sup>10</sup> to identify the WD40 folded structure and predicted to form two WD40 domains - one with 6 WD40 repeats and one with 7 WD40 repeats.

EF hand motifs were identified by searching (using Geneious software, RRID:SCR\_010519) for the canonical and pseudo PROSITE motif sequences defined in <sup>[11]</sup> and allowing for a maximum 1 base pair mismatch. Because the pseudo EF hand motif contains a variable size region, there were two potential start locations in the sequence – residue 44 or 47. However, the AlphaFold prediction showed residues that should form the loop region would instead form part of the alpha helix in the motif beginning at residue 44. We therefore favored the motif beginning at residue 47. Locations of the calcium binding residues were determined based on the consensus sequence logograms in <sup>[11]</sup>.

WDY orthologue sequences were obtained as described in Table S6. The proteins were aligned in Geneious using a BLOSUM cost matrix with a gap open cost of 10 and a gap extend cost of 0.1.

## REFERENCES

1. Chang, C.-H. & Larracuente, A. M. Heterochromatin-Enriched Assemblies Reveal the Sequence and Organization of the *Drosophila melanogaster* Y Chromosome. *Genetics* **211**, 333–348 (2019).
2. Kane, N. S., Vora, M., Varre, K. J. & Padgett, R. W. Efficient Screening of CRISPR/Cas9-Induced Events in *Drosophila* Using a Co-CRISPR Strategy. *G3 (Bethesda)* **7**, 87–93 (2016).
3. Poe, A. R. *et al.* Robust CRISPR/Cas9-Mediated Tissue-Specific Mutagenesis Reveals Gene Redundancy and Perdurance in *Drosophila*. *Genetics* **211**, 459–472 (2019).
4. Siddall, N. A. & Hime, G. R. A *Drosophila* toolkit for defining gene function in spermatogenesis. *Reproduction* **153**, R121–R132 (2017).
5. Champer, J. *et al.* Reducing resistance allele formation in CRISPR gene drive. *Proc. Natl. Acad. Sci. U.S.A.* **115**, 5522–5527 (2018).
6. Renault, A. D. *vasa* is expressed in somatic cells of the embryonic gonad in a sex-specific manner in *Drosophila melanogaster*. *Biol Open* **1**, 1043–1048 (2012).
7. Hafezi, Y., Sruba, S. R., Tarrash, S. R., Wolfner, M. F. & Clark, A. G. Dissecting Fertility Functions of *Drosophila* Y Chromosome Genes with CRISPR. *Genetics* **214**, 977–990 (2020).
8. Buchman, A. & Akbari, O. S. Site-specific transgenesis of the *Drosophila melanogaster* Y-chromosome using CRISPR/Cas9. *Insect Mol Biol* **28**, 65–73 (2019).
9. Lung, O. & Wolfner, M. F. Identification and characterization of the major *Drosophila melanogaster* mating plug protein. *Insect Biochemistry and Molecular Biology* **31**, 543–551 (2001).
10. Jumper, J. *et al.* Highly accurate protein structure prediction with AlphaFold. *Nature* **596**, 583–589 (2021).
11. Zhou, Y. *et al.* Prediction of EF-hand calcium-binding proteins and analysis of bacterial EF-hand proteins. *Proteins: Structure, Function, and Bioinformatics* **65**, 643–655 (2006).

**Figure 1: Spermatogenesis is backed up in *WDY* testes, but some mature sperm is found in the seminal vesicle**

bioRxiv preprint doi: <https://doi.org/10.1101/2023.02.02.526876>; this version posted February 3, 2023. The copyright holder for this preprint (which was not certified by peer review) is the author/funder, who has granted bioRxiv a license to display the preprint in perpetuity. It is made available under aCC-BY 4.0 International license.

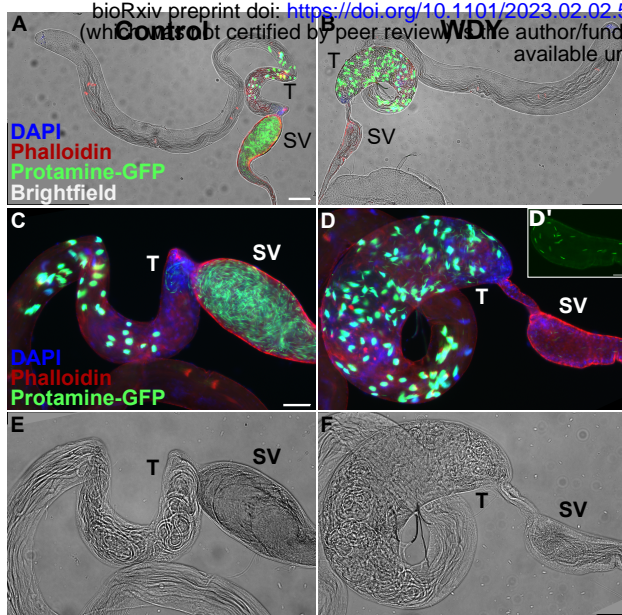

**Figure 2: *WDY* and *PRY* mutant sperm fail to enter the storage organs in the female**

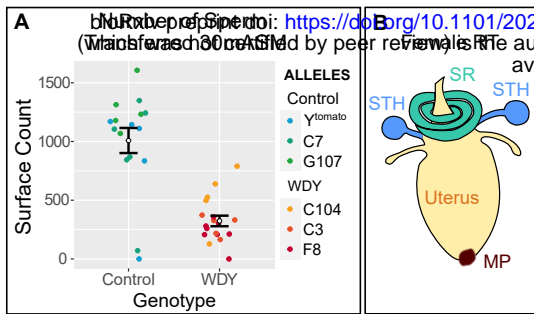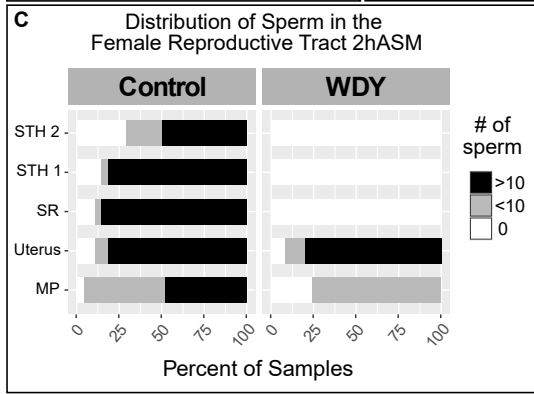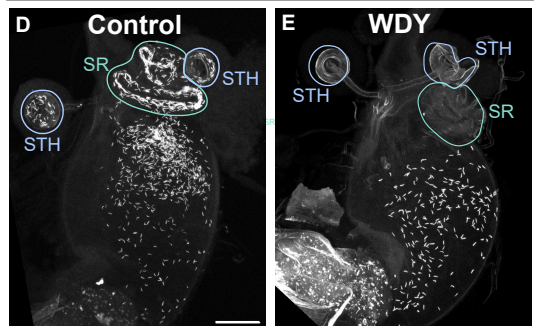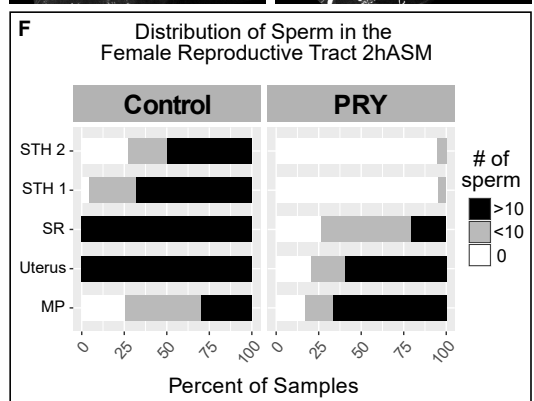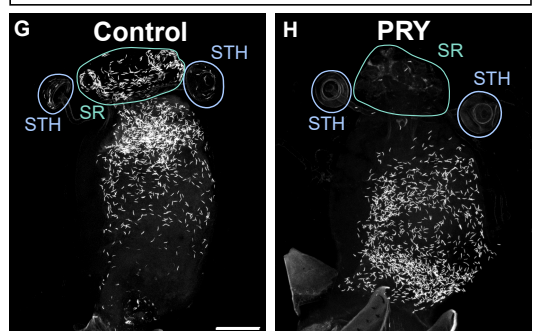



**Figure 3: *WDY* mutant sperm have a reduced beating frequency and do not swim in the female reproductive tract**

bioRxiv preprint doi: <https://doi.org/10.1101/2023.02.03.528165>; this version posted February 3, 2023. The copyright holder for this preprint (which was not certified by peer review) is the author/funder, who has granted bioRxiv a license to display the preprint in perpetuity. It is made available under aCC-BY 4.0 International license.

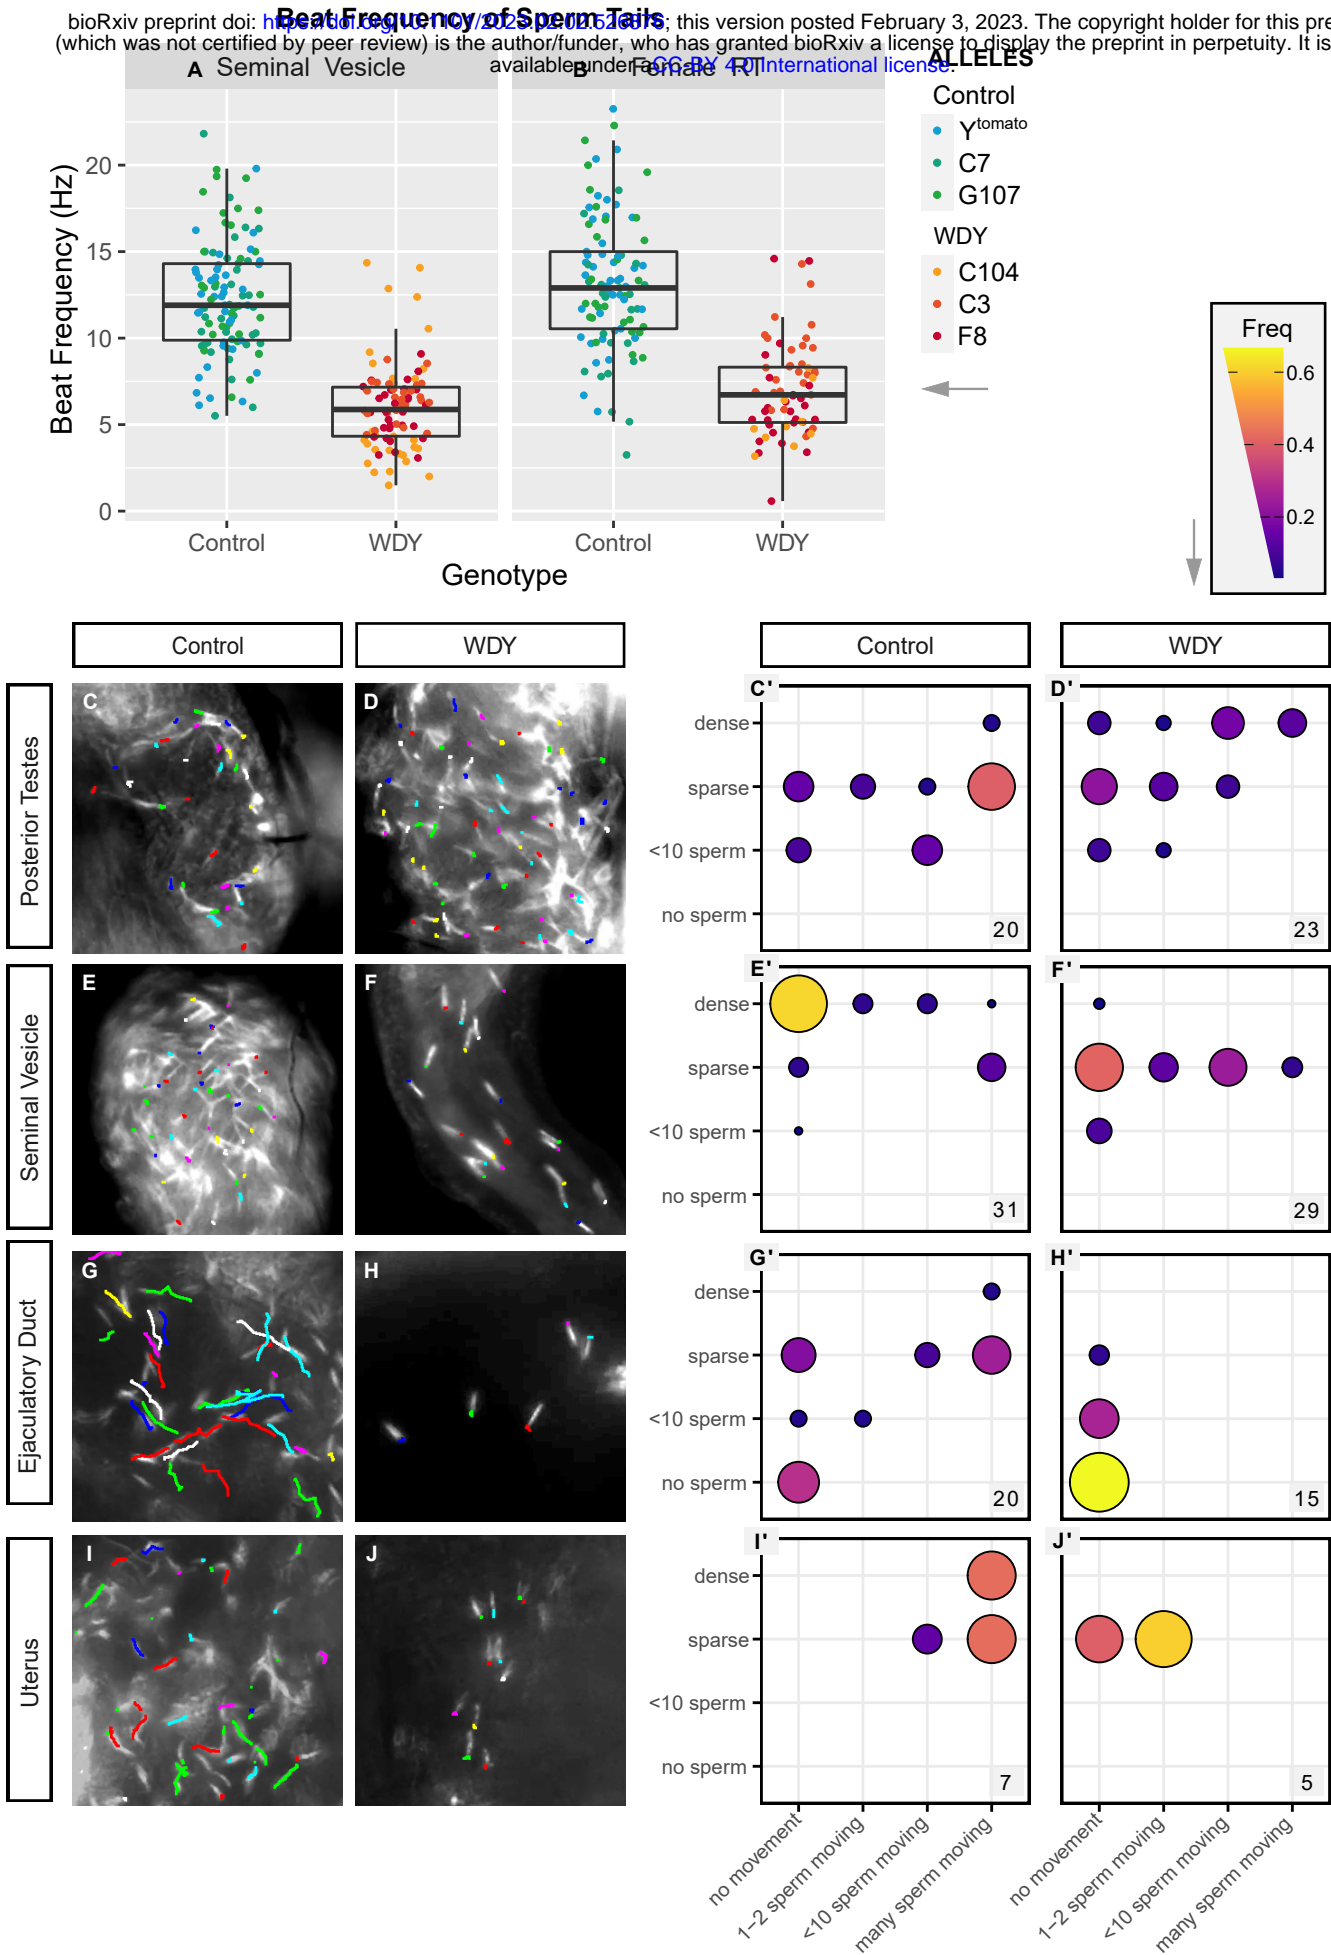

**Figure 4: Difference in hydrophobicity in the EF Hand Domain in Y-linked orthologues of WDY in**

***Drosophila melanogaster* and its closest relatives.**

bioRxiv preprint doi: <https://doi.org/10.1101/2023.02.02.526876>; this version posted February 3, 2023. The copyright holder for this preprint (which was not certified by peer review) is the author/funder, who has granted bioRxiv a license to display the preprint in perpetuity. It is made available under aCC-BY 4.0 International license.

**A**

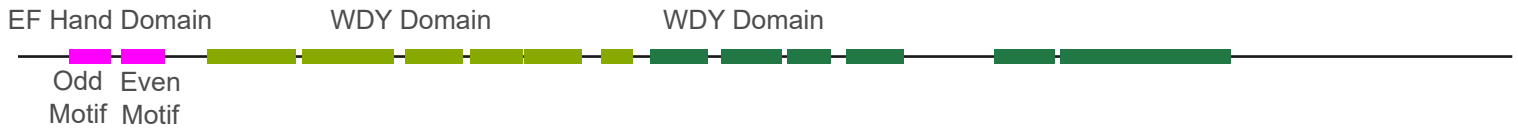

**B Odd EF Hand**

| Species             | 1 | 2 | 3 | 4 | 5 | 6 | 7 | 8 | 9 | 10 | 11 | 12 | 13 | 14 | 15 | 16 | 17 | 18 | 19 | 20 | 21 | 22 | 23 | 24 | 25 | 26 | 27 | 28 | 29 | 30 | 31 | 32 | 33 | 34 | 35 | 36 | 37 | 38 | 39 | 40 | 41 | 42 | 43 | 44 | 45 | 46 | 47 | 48 | 49 | 50 | 51 | 52 | 53 | 54 | 55 | 56 | 57 | 58 | 59 | 60 | 61 | 62 | 63 | 64 | 65 | 66 | 67 | 68 | 69 | 70 | 71 | 72 | 73 | 74 | 75 | 76 | 77 | 78 | 79 | 80 | 81 | 82 | 83 | 84 | 85 | 86 | 87 | 88 | 89 | 90 | 91 | 92 | 93 | 94 | 95 | 96 | 97 | 98 | 99 | 100 |
|---------------------|---|---|---|---|---|---|---|---|---|----|----|----|----|----|----|----|----|----|----|----|----|----|----|----|----|----|----|----|----|----|----|----|----|----|----|----|----|----|----|----|----|----|----|----|----|----|----|----|----|----|----|----|----|----|----|----|----|----|----|----|----|----|----|----|----|----|----|----|----|----|----|----|----|----|----|----|----|----|----|----|----|----|----|----|----|----|----|----|----|----|----|----|----|----|----|----|----|----|----|-----|
| <b>melanogaster</b> | D | Q | L | E | K | L | Y | S | S | F  | L  | N  | T  | P  | E  | R  | H  | V  | G  | I  | D  | E  | L  | R  | I  | I  |    |    |    |    |    |    |    |    |    |    |    |    |    |    |    |    |    |    |    |    |    |    |    |    |    |    |    |    |    |    |    |    |    |    |    |    |    |    |    |    |    |    |    |    |    |    |    |    |    |    |    |    |    |    |    |    |    |    |    |    |    |    |    |    |    |    |    |    |    |    |    |    |    |     |
| D.mauritiana        | D | Q | L | E | K | L | H | S | A | F  | L  | N  | T  | P  | E  | R  | H  | V  | G  | I  | D  | E  | L  | R  | I  | I  |    |    |    |    |    |    |    |    |    |    |    |    |    |    |    |    |    |    |    |    |    |    |    |    |    |    |    |    |    |    |    |    |    |    |    |    |    |    |    |    |    |    |    |    |    |    |    |    |    |    |    |    |    |    |    |    |    |    |    |    |    |    |    |    |    |    |    |    |    |    |    |    |    |     |
| D.sechelia          | D | Q | L | E | K | L | H | S | A | F  | L  | N  | T  | P  | E  | R  | H  | V  | G  | I  | D  | E  | L  | R  | I  | I  |    |    |    |    |    |    |    |    |    |    |    |    |    |    |    |    |    |    |    |    |    |    |    |    |    |    |    |    |    |    |    |    |    |    |    |    |    |    |    |    |    |    |    |    |    |    |    |    |    |    |    |    |    |    |    |    |    |    |    |    |    |    |    |    |    |    |    |    |    |    |    |    |    |     |
| D.ananassae         | E | Q | L | E | K | L | H | E | A | F  | L  | N  | A  | P  | E  | R  | Q  | V  | G  | I  | D  | D  | L  | R  | V  | M  |    |    |    |    |    |    |    |    |    |    |    |    |    |    |    |    |    |    |    |    |    |    |    |    |    |    |    |    |    |    |    |    |    |    |    |    |    |    |    |    |    |    |    |    |    |    |    |    |    |    |    |    |    |    |    |    |    |    |    |    |    |    |    |    |    |    |    |    |    |    |    |    |    |     |
| D.persimilis        | E | Q | L | E | K | L | N | Q | A | F  | N  | E  | R  | P  | D  | S  | Q  | V  | G  | F  | D  | D  | L  | R  | G  | L  |    |    |    |    |    |    |    |    |    |    |    |    |    |    |    |    |    |    |    |    |    |    |    |    |    |    |    |    |    |    |    |    |    |    |    |    |    |    |    |    |    |    |    |    |    |    |    |    |    |    |    |    |    |    |    |    |    |    |    |    |    |    |    |    |    |    |    |    |    |    |    |    |    |     |
| D.miranda           | E | Q | L | E | K | L | N | Q | A | F  | N  | E  | R  | P  | D  | S  | Q  | V  | G  | F  | D  | D  | L  | R  | G  | L  |    |    |    |    |    |    |    |    |    |    |    |    |    |    |    |    |    |    |    |    |    |    |    |    |    |    |    |    |    |    |    |    |    |    |    |    |    |    |    |    |    |    |    |    |    |    |    |    |    |    |    |    |    |    |    |    |    |    |    |    |    |    |    |    |    |    |    |    |    |    |    |    |    |     |
| <b>obscura</b>      | E | Q | L | E | K | L | N | Q | A | F  | N  | E  | R  | P  | D  | S  | Q  | V  | G  | F  | D  | D  | L  | R  | S  | L  |    |    |    |    |    |    |    |    |    |    |    |    |    |    |    |    |    |    |    |    |    |    |    |    |    |    |    |    |    |    |    |    |    |    |    |    |    |    |    |    |    |    |    |    |    |    |    |    |    |    |    |    |    |    |    |    |    |    |    |    |    |    |    |    |    |    |    |    |    |    |    |    |    |     |
| D.pseudoobscura     | E | Q | L | E | K | L | N | Q | A | F  | N  | E  | R  | P  | D  | S  | Q  | V  | G  | F  | D  | D  | L  | R  | S  | L  |    |    |    |    |    |    |    |    |    |    |    |    |    |    |    |    |    |    |    |    |    |    |    |    |    |    |    |    |    |    |    |    |    |    |    |    |    |    |    |    |    |    |    |    |    |    |    |    |    |    |    |    |    |    |    |    |    |    |    |    |    |    |    |    |    |    |    |    |    |    |    |    |    |     |
| D.guanche           | D | Q | L | D | K | L | H | Q | A | F  | S  | E  | R  | P  | D  | S  | Q  | V  | G  | F  | G  | D  | L  | R  | S  | L  |    |    |    |    |    |    |    |    |    |    |    |    |    |    |    |    |    |    |    |    |    |    |    |    |    |    |    |    |    |    |    |    |    |    |    |    |    |    |    |    |    |    |    |    |    |    |    |    |    |    |    |    |    |    |    |    |    |    |    |    |    |    |    |    |    |    |    |    |    |    |    |    |    |     |
| D.subobscura        | D | Q | L | D | K | L | H | Q | A | F  | S  | E  | R  | P  | D  | S  | Q  | V  | G  | F  | G  | D  | L  | R  | S  | L  |    |    |    |    |    |    |    |    |    |    |    |    |    |    |    |    |    |    |    |    |    |    |    |    |    |    |    |    |    |    |    |    |    |    |    |    |    |    |    |    |    |    |    |    |    |    |    |    |    |    |    |    |    |    |    |    |    |    |    |    |    |    |    |    |    |    |    |    |    |    |    |    |    |     |
| D.obscura           | D | Q | L | E | K | L | N | Q | A | F  | S  | E  | R  | P  | D  | S  | Q  | V  | G  | I  | D  | D  | L  | R  | S  | L  |    |    |    |    |    |    |    |    |    |    |    |    |    |    |    |    |    |    |    |    |    |    |    |    |    |    |    |    |    |    |    |    |    |    |    |    |    |    |    |    |    |    |    |    |    |    |    |    |    |    |    |    |    |    |    |    |    |    |    |    |    |    |    |    |    |    |    |    |    |    |    |    |    |     |

**C Even EF Hand**

| Species             | 1 | 2 | 3 | 4 | 5 | 6 | 7 | 8 | 9 | 10 | 11 | 12 | 13 | 14 | 15 | 16 | 17 | 18 | 19 | 20 | 21 | 22 | 23 | 24 | 25 | 26 | 27 | 28 | 29 | 30 | 31 | 32 | 33 | 34 | 35 | 36 | 37 | 38 | 39 | 40 | 41 | 42 | 43 | 44 | 45 | 46 | 47 | 48 | 49 | 50 | 51 | 52 | 53 | 54 | 55 | 56 | 57 | 58 | 59 | 60 | 61 | 62 | 63 | 64 | 65 | 66 | 67 | 68 | 69 | 70 | 71 | 72 | 73 | 74 | 75 | 76 | 77 | 78 | 79 | 80 | 81 | 82 | 83 | 84 | 85 | 86 | 87 | 88 | 89 | 90 | 91 | 92 | 93 | 94 | 95 | 96 | 97 | 98 | 99 | 100 |
|---------------------|---|---|---|---|---|---|---|---|---|----|----|----|----|----|----|----|----|----|----|----|----|----|----|----|----|----|----|----|----|----|----|----|----|----|----|----|----|----|----|----|----|----|----|----|----|----|----|----|----|----|----|----|----|----|----|----|----|----|----|----|----|----|----|----|----|----|----|----|----|----|----|----|----|----|----|----|----|----|----|----|----|----|----|----|----|----|----|----|----|----|----|----|----|----|----|----|----|----|----|-----|
| <b>melanogaster</b> | D | S | M | Y | T | R | L | F | L | K  | I  | N  | Q  | N  | R  | D  | F  | K  | V  | D  | W  | N  | E  | F  | V  | S  | Y  | L  | I  | F  | G  | F  | Q  | E  |    |    |    |    |    |    |    |    |    |    |    |    |    |    |    |    |    |    |    |    |    |    |    |    |    |    |    |    |    |    |    |    |    |    |    |    |    |    |    |    |    |    |    |    |    |    |    |    |    |    |    |    |    |    |    |    |    |    |    |    |    |    |    |    |    |     |
| D.mauritiana        | D | S | M | Y | T | R | L | F | L | K  | I  | N  | Q  | N  | R  | D  | F  | K  | V  | D  | W  | N  | E  | F  | V  | S  | Y  | L  | I  | F  | G  | F  | Q  | E  |    |    |    |    |    |    |    |    |    |    |    |    |    |    |    |    |    |    |    |    |    |    |    |    |    |    |    |    |    |    |    |    |    |    |    |    |    |    |    |    |    |    |    |    |    |    |    |    |    |    |    |    |    |    |    |    |    |    |    |    |    |    |    |    |    |     |
| D.sechelia          | D | S | M | Y | T | R | L | F | L | K  | I  | N  | Q  | N  | H  | D  | F  | K  | V  | D  | W  | N  | E  | F  | V  | S  | Y  | L  | I  | F  | G  | F  | Q  | E  |    |    |    |    |    |    |    |    |    |    |    |    |    |    |    |    |    |    |    |    |    |    |    |    |    |    |    |    |    |    |    |    |    |    |    |    |    |    |    |    |    |    |    |    |    |    |    |    |    |    |    |    |    |    |    |    |    |    |    |    |    |    |    |    |    |     |
| D.ananassae         | D | S | M | Y | T | R | L | F | L | K  | I  | N  | Q  | N  | R  | D  | F  | R  | V  | D  | W  | N  | E  | F  | V  | S  | Y  | L  | I  | F  | G  | F  | Q  | E  |    |    |    |    |    |    |    |    |    |    |    |    |    |    |    |    |    |    |    |    |    |    |    |    |    |    |    |    |    |    |    |    |    |    |    |    |    |    |    |    |    |    |    |    |    |    |    |    |    |    |    |    |    |    |    |    |    |    |    |    |    |    |    |    |    |     |
| D.persimilis        | D | A | V | Y | N | R | L | F | L | K  | I  | N  | Q  | N  | R  | D  | F  | M  | V  | D  | W  | N  | E  | F  | V  | S  | Y  | L  | I  | F  | G  | F  | Q  | E  |    |    |    |    |    |    |    |    |    |    |    |    |    |    |    |    |    |    |    |    |    |    |    |    |    |    |    |    |    |    |    |    |    |    |    |    |    |    |    |    |    |    |    |    |    |    |    |    |    |    |    |    |    |    |    |    |    |    |    |    |    |    |    |    |    |     |
| D.miranda           | D | A | V | Y | N | R | L | F | L | K  | I  | N  | Q  | N  | R  | D  | F  | M  | V  | D  | W  | N  | E  | F  | V  | S  | Y  | L  | I  | F  | G  | F  | Q  | E  |    |    |    |    |    |    |    |    |    |    |    |    |    |    |    |    |    |    |    |    |    |    |    |    |    |    |    |    |    |    |    |    |    |    |    |    |    |    |    |    |    |    |    |    |    |    |    |    |    |    |    |    |    |    |    |    |    |    |    |    |    |    |    |    |    |     |
| <b>obscura</b>      | D | A | V | Y | N | R | L | F | L | K  | I  | N  | Q  | N  | R  | D  | F  | M  | V  | D  | W  | N  | E  | F  | V  | S  | Y  | L  | I  | F  | G  | F  | Q  | E  |    |    |    |    |    |    |    |    |    |    |    |    |    |    |    |    |    |    |    |    |    |    |    |    |    |    |    |    |    |    |    |    |    |    |    |    |    |    |    |    |    |    |    |    |    |    |    |    |    |    |    |    |    |    |    |    |    |    |    |    |    |    |    |    |    |     |
| D.pseudoobscura     | D | A | V | Y | N | R | L | F | L | K  | I  | N  | Q  | N  | R  | D  | F  | M  | V  | D  | W  | N  | E  | F  | V  | S  | Y  | L  | I  | F  | G  | F  | Q  | E  |    |    |    |    |    |    |    |    |    |    |    |    |    |    |    |    |    |    |    |    |    |    |    |    |    |    |    |    |    |    |    |    |    |    |    |    |    |    |    |    |    |    |    |    |    |    |    |    |    |    |    |    |    |    |    |    |    |    |    |    |    |    |    |    |    |     |
| D.guanche           | D | A | V | Y | K | R | L | F | L | K  | I  | N  | Q  | N  | R  | D  | F  | R  | V  | D  | W  | N  | E  | F  | V  | S  | Y  | L  | I  | F  | G  | F  | Q  | E  |    |    |    |    |    |    |    |    |    |    |    |    |    |    |    |    |    |    |    |    |    |    |    |    |    |    |    |    |    |    |    |    |    |    |    |    |    |    |    |    |    |    |    |    |    |    |    |    |    |    |    |    |    |    |    |    |    |    |    |    |    |    |    |    |    |     |
| D.subobscura        | D | A | V | Y | K | R | L | F | L | K  | I  | N  | Q  | N  | R  | D  | F  | R  | V  | D  | W  | N  | E  | F  | V  | S  | Y  | L  | I  | F  | G  | F  | Q  | E  |    |    |    |    |    |    |    |    |    |    |    |    |    |    |    |    |    |    |    |    |    |    |    |    |    |    |    |    |    |    |    |    |    |    |    |    |    |    |    |    |    |    |    |    |    |    |    |    |    |    |    |    |    |    |    |    |    |    |    |    |    |    |    |    |    |     |
| D.obscura           | D | A | V | Y | T | R | L | F | L | K  | I  | N  | Q  | N  | R  | D  | F  | K  | V  | D  | W  | N  | E  | F  | V  | S  | Y  | L  | I  | F  | G  | F  | Q  | E  |    |    |    |    |    |    |    |    |    |    |    |    |    |    |    |    |    |    |    |    |    |    |    |    |    |    |    |    |    |    |    |    |    |    |    |    |    |    |    |    |    |    |    |    |    |    |    |    |    |    |    |    |    |    |    |    |    |    |    |    |    |    |    |    |    |     |

**D**

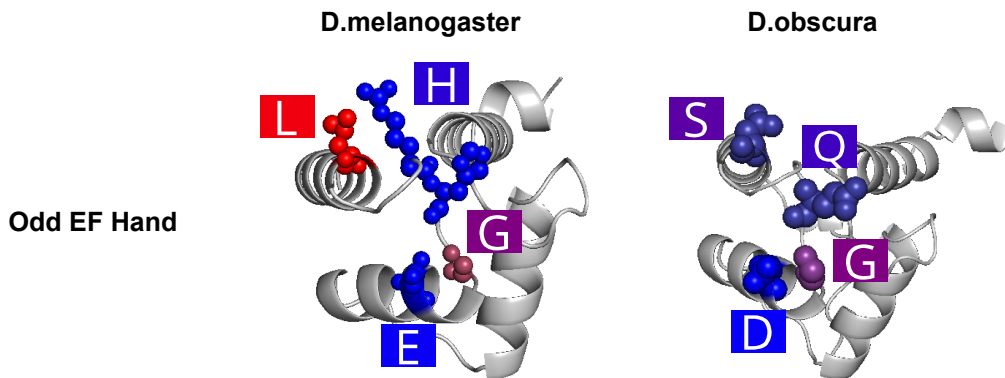

Source: https://www.biorxiv.org/content/10.1101/2023.02.02.526876v1.full.pdf
